# Supplementary material for: Cancer-related genes in the transcription signature of facioscapulohumeral dystrophy myoblasts and myotubes
Source: PubMed Central journal article supplement (PMC3930408; doi:10.1111/jcmm.12182), 2013-12-17
Supplement: jcmm0018-0208-sd4.pdf [file jcmm0018-0208-sd4.pdf]

| List A | GeneID   | Gene name | FSHD | Cancer-related genes: |        |        |        |        |        |                                                                                                 | Gene description |
|--------|----------|-----------|------|-----------------------|--------|--------|--------|--------|--------|-------------------------------------------------------------------------------------------------|------------------|
|        |          |           |      | List 1                | List 2 | List 3 | List 4 | List 5 | List 6 | List 7                                                                                          |                  |
| 70     | ACTC1    | UP        |      |                       | X      |        |        |        |        | actin, alpha, cardiac muscle 1                                                                  |                  |
| 8038   | ADAM12   | UP        | X    |                       |        |        |        |        |        | ADAM metalloproteinase domain 12                                                                |                  |
| 125    | ADH1B    | DOWN      |      |                       | X      |        |        |        |        | alcohol dehydrogenase 1B (class I), beta polypeptide                                            |                  |
| 126    | ADH1C    | DOWN      |      |                       | X      |        |        |        |        | alcohol dehydrogenase 1C (class I), gamma polypeptide                                           |                  |
| 8165   | AKAP1    | UP        |      |                       | X      |        |        |        |        | A kinase (PRKA) anchor protein 1                                                                |                  |
| 8644   | AKR1C3   | DOWN      |      |                       |        |        |        |        | X      | aldo-keto reductase family 1, member C3                                                         |                  |
| 246    | ALOX15   | UP        |      |                       |        |        |        |        | X      | arachidonate 15-lipoxygenase                                                                    |                  |
| 301    | ANXA1    | UP        |      |                       | X      |        |        |        |        | annexin A1                                                                                      |                  |
| 347    | APOD     | DOWN      |      |                       | X      |        |        |        |        | apolipoprotein D                                                                                |                  |
| 23365  | ARHGEF12 | UP        |      |                       |        |        |        |        | X      | Rho guanine nucleotide exchange factor (GEF) 12                                                 |                  |
| 9823   | ARMCX2   | DOWN      |      |                       |        | X      |        |        | X      | armadillo repeat containing, X-linked 2                                                         |                  |
| 797    | CALCB    | UP        |      |                       | X      |        |        |        |        | calcitonin-related polypeptide beta                                                             |                  |
| 801    | CALM1    | DOWN      |      |                       | X      |        |        |        |        | calmodulin 1 (phosphorylase kinase, delta)                                                      |                  |
| 805    | CALM2    | DOWN      |      |                       | X      |        |        |        |        | calmodulin 2 (phosphorylase kinase, delta)                                                      |                  |
| 23261  | CAMTA1   | DOWN      |      |                       | X      |        |        |        |        | calmodulin binding transcription activator 1                                                    |                  |
| 64151  | CAPG     | UP        |      |                       |        |        | X      |        |        | capping protein (actin filament), gelsolin-like                                                 |                  |
| 834    | CASP1    | UP        |      |                       |        |        |        |        | X      | caspase 1, apoptosis-related cysteine peptidase                                                 |                  |
| 867    | CBL      | DOWN      |      |                       |        |        |        |        | X      | Cbl proto-oncogene, E3 ubiquitin protein ligase                                                 |                  |
| 868    | CBLB     | UP        |      |                       |        |        |        |        | X      | Cbl proto-oncogene, E3 ubiquitin protein ligase B                                               |                  |
| 891    | CCNB1    | DOWN      |      |                       |        | X      |        |        |        | cyclin B1                                                                                       |                  |
| 595    | CCND1    | UP        |      |                       | X      |        |        |        | X      | cyclin D1                                                                                       |                  |
| 1230   | CCR1     | UP        |      |                       |        | X      |        |        |        | chemokine (C-C motif) receptor 1                                                                |                  |
| 960    | CD44     | UP        |      |                       | X      |        |        |        |        | CD44 molecule (Indian blood group)                                                              |                  |
| 1050   | CEBPA    | DOWN      |      |                       |        |        |        |        | X      | CCAAT/enhancer binding protein (C/EBP), alpha                                                   |                  |
| 3075   | CFH      | UP        |      |                       | X      |        |        |        |        | complement factor H                                                                             |                  |
| 1120   | CHKB     | UP        |      |                       | X      |        |        |        |        | choline kinase beta                                                                             |                  |
| 1152   | CKB      | UP        |      |                       | X      |        |        |        |        | creatine kinase, brain                                                                          |                  |
| 7123   | CLEC3B   | UP        | X    |                       |        |        |        |        |        | C-type lectin domain family 3, member B                                                         |                  |
| 1277   | COL1A1   | UP        |      |                       |        |        |        |        | X      | collagen, type I, alpha 1                                                                       |                  |
| 1278   | COL1A2   | UP        |      |                       |        |        |        | X      | X      | collagen, type I, alpha 2                                                                       |                  |
| 1397   | CRIP2    | UP        |      |                       |        |        |        |        | X      | cysteine-rich protein 2                                                                         |                  |
| 1436   | CSF1R    | DOWN      |      |                       |        |        |        |        | X      | colony stimulating factor 1 receptor                                                            |                  |
| 1508   | CTSB     | UP        |      |                       |        |        |        |        | X      | cathepsin B                                                                                     |                  |
| 1512   | CTSH     | UP        |      |                       |        | X      |        |        | X      | cathepsin H                                                                                     |                  |
| 1756   | DMD      | DOWN      | X    |                       |        |        | X      |        |        | dystrophin                                                                                      |                  |
| 2072   | ERCC4    | UP        |      |                       |        |        |        |        | X      | excision repair cross-complementing rodent repair deficiency, complementation group 4           |                  |
| 10160  | FARP1    | UP        | X    |                       |        |        |        |        |        | FERM, RhoGEF (ARHGEF) and pleckstrin domain protein 1 (chondrocyte-derived)                     |                  |
| 2213   | FCGR2B   | UP        |      |                       |        |        |        |        | X      | Fc fragment of IgG, low affinity IIb, receptor (CD32)                                           |                  |
| 2329   | FMO4     | DOWN      | X    |                       |        |        |        |        |        | flavin containing monooxygenase 4                                                               |                  |
| 2353   | FOS      | DOWN      |      |                       | X      |        |        |        |        | FBJ murine osteosarcoma viral oncogene homolog                                                  |                  |
| 10468  | FST      | UP        |      |                       |        | X      |        |        |        | folliculin                                                                                      |                  |
| 8522   | GAS7     | UP        |      |                       |        |        |        |        | X      | growth arrest-specific 7                                                                        |                  |
| 2719   | GPC3     | UP        |      |                       |        |        |        |        | X      | glypican 3                                                                                      |                  |
| 3569   | HGF      | DOWN      |      |                       |        |        |        |        | X      | hepatocyte growth factor (hepatoietin A; scatter factor)                                        |                  |
| 8364   | HIST1H4C | UP        |      |                       |        | X      |        |        |        | histone cluster 1, H4c                                                                          |                  |
| 3205   | HOXA9    | UP        |      | X                     |        |        |        |        | X      | homeobox A9                                                                                     |                  |
| 3492   | IGH@     | UP        |      |                       |        |        |        |        | X      | immunoglobulin heavy locus                                                                      |                  |
| 3493   | IGHA1    | UP        |      |                       |        |        |        |        | X      | immunoglobulin heavy constant alpha 1                                                           |                  |
| 3494   | IGHA2    | UP        |      |                       |        |        |        |        | X      | immunoglobulin heavy constant alpha 2 (A2m marker)                                              |                  |
| 3500   | IGHG1    | UP        |      |                       |        |        |        |        | X      | immunoglobulin heavy constant gamma 1 (G1m marker)                                              |                  |
| 3501   | IGHG2    | UP        |      |                       |        |        |        |        | X      | immunoglobulin heavy constant gamma 2 (G2m marker)                                              |                  |
| 3503   | IGHG4    | UP        |      |                       |        |        |        |        | X      | immunoglobulin heavy constant gamma 4 (G4m marker)                                              |                  |
| 3587   | IL10RA   | UP        |      |                       |        | X      |        |        |        | interleukin 10 receptor, alpha                                                                  |                  |
| 3690   | ITGB3    | DOWN      |      |                       | X      |        |        |        |        | integrin, beta 3 (platelet glycoprotein IIIa, antigen CD61)                                     |                  |
| 182    | JAG1     | UP        |      |                       |        |        |        |        | X      | jagged 1                                                                                        |                  |
| 3725   | JUN      | DOWN      |      |                       | X      |        |        |        | X      | jun proto-oncogene                                                                              |                  |
| 3726   | JUNB     | DOWN      |      |                       |        | X      |        |        | X      | jun B proto-oncogene                                                                            |                  |
| 3945   | LDHB     | UP        |      |                       | X      |        |        |        |        | lactate dehydrogenase B                                                                         |                  |
| 3936   | LPL      | UP        |      |                       |        |        |        |        | X      | lipoprotein lipase                                                                              |                  |
| 4212   | MEIS2    | DOWN      |      |                       | X      |        |        |        |        | Meis homeobox 2                                                                                 |                  |
| 4291   | MLF1     | UP        |      |                       |        |        |        |        | X      | myeloid leukemia factor 1                                                                       |                  |
| 10962  | MLLT11   | DOWN      |      |                       |        |        | X      |        | X      | myeloid/lymphoid or mixed-lineage leukemia (trithorax homolog, Drosophila); translocated to, 11 |                  |
| 4318   | MMP9     | UP        |      |                       | X      |        |        | X      | X      | matrix metalloproteinase 9 (gelatinase B, 92kDa gelatinase, 92kDa type IV collagenase)          |                  |
| 4609   | MYC      | DOWN      | X    | X                     |        |        |        |        | X      | v-myc myelocytomatosis viral oncogene homolog (avian)                                           |                  |
| 4763   | NF1      | UP        | X    |                       |        |        |        |        | X      | neurofibromin 1                                                                                 |                  |
| 4791   | NFKB2    | DOWN      |      |                       |        |        | X      | X      |        | nuclear factor of kappa light polypeptide gene enhancer in B-cells 2 (p49/p100)                 |                  |
| 3164   | NR4A1    | DOWN      |      | X                     |        |        |        |        |        | nuclear receptor subfamily 4, group A, member 1                                                 |                  |
| 8013   | NR4A3    | UP        |      |                       |        |        |        |        | X      | nuclear receptor subfamily 4, group A, member 3                                                 |                  |
| 9315   | NREP     | UP        |      |                       |        | X      |        |        |        | neuronal regeneration related protein                                                           |                  |
| 4928   | NUP98    | DOWN      |      |                       |        |        |        |        | X      | nucleoporin 98kDa                                                                               |                  |
| 8572   | PDLIM4   | UP        |      |                       |        |        | X      |        |        | PDZ and LIM domain 4                                                                            |                  |
| 5371   | PML      | DOWN      |      |                       |        |        |        |        | X      | promyelocytic leukemia                                                                          |                  |
| 7799   | PRDM2    | DOWN      |      |                       |        |        |        |        | X      | PR domain containing 2, with ZNF domain                                                         |                  |
| 5567   | PRKACB   | UP        |      |                       |        |        | X      |        |        | protein kinase, cAMP-dependent, catalytic, beta                                                 |                  |
| 5728   | PTEN     | DOWN      | X    | X                     |        |        |        |        | X      | phosphatase and tensin homolog                                                                  |                  |

|               |         |      |   |   |   |   |  |   |                                                                 |
|---------------|---------|------|---|---|---|---|--|---|-----------------------------------------------------------------|
| 9401          | RECQL4  | DOWN |   |   |   |   |  | X | RecQ protein-like 4                                             |
| 5970          | RELA    | DOWN | X |   |   |   |  | X | v-rel reticuloendotheliosis viral oncogene homolog A (avian)    |
| 388           | RHOB    | DOWN |   |   |   |   |  | X | ras homolog family member B                                     |
| 22800         | RRAS2   | UP   |   |   | X |   |  |   | related RAS viral (r-ras) oncogene homolog 2                    |
| 23623         | RUSC1   | UP   |   |   |   | X |  |   | RUN and SH3 domain containing 1                                 |
| 6284          | S100A13 | UP   |   |   |   |   |  | X | S100 calcium binding protein A13                                |
| 6414          | SEPP1   | UP   |   | X |   |   |  |   | selenoprotein P, plasma, 1                                      |
| 946           | SIGLEC6 | UP   |   | X |   |   |  |   | sialic acid binding Ig-like lectin 6                            |
| 6886          | TAL1    | DOWN |   |   |   |   |  | X | T-cell acute lymphocytic leukemia 1                             |
| 7037          | TFRC    | UP   | X | X |   |   |  | X | transferrin receptor (p90, CD71)                                |
| 7040          | TGFB1   | UP   |   | X |   |   |  |   | transforming growth factor, beta 1                              |
| 7043          | TGFB3   | DOWN |   | X |   |   |  |   | transforming growth factor, beta 3                              |
| 7140          | TNNT3   | DOWN |   | X |   |   |  |   | troponin T type 3 (skeletal, fast)                              |
| 9099          | USP2    | UP   | X |   |   |   |  |   | ubiquitin specific peptidase 2                                  |
| 7428          | VHL     | UP   | X |   |   |   |  | X | von Hippel-Lindau tumor suppressor, E3 ubiquitin protein ligase |
| Total genes:  |         | 93   |   |   |   |   |  |   |                                                                 |
| List A total: |         | 539  |   |   |   |   |  |   |                                                                 |

| List B | GeneID        | Gene name | FSHD | Cancer-related genes: |             |              |              |             |             |                                                                                                       | Gene description |
|--------|---------------|-----------|------|-----------------------|-------------|--------------|--------------|-------------|-------------|-------------------------------------------------------------------------------------------------------|------------------|
|        |               |           |      | List 1<br>6           | List 2<br>4 | List 3<br>10 | List 4<br>10 | List 5<br>6 | List 6<br>9 | List 7<br>16                                                                                          |                  |
| 231    | AKR1B1        | DOWN      |      |                       | X           |              |              |             |             | aldo-keto reductase family 1, member B1 (aldose reductase)                                            |                  |
| 10000  | AKT3          | DOWN      |      |                       |             |              |              |             | X           | v-akt murine thymoma viral oncogene homolog 3 (protein kinase B, gamma)                               |                  |
| 214    | ALCAM         | DOWN      |      |                       |             |              |              | X           |             | activated leukocyte cell adhesion molecule                                                            |                  |
| 4329   | ALDH6A1       | DOWN      | X    |                       |             |              |              |             |             | aldehyde dehydrogenase 6 family, member A1                                                            |                  |
| 367    | AR            | DOWN      |      |                       | X           |              |              |             | X           | androgen receptor                                                                                     |                  |
| 604    | BCL6          | DOWN      |      |                       |             |              |              |             | X           | B-cell CLL/lymphoma 6                                                                                 |                  |
| 800    | CALD1         | DOWN      |      |                       |             |              |              | X           |             | caldesmon 1                                                                                           |                  |
| 868    | CBLB          | DOWN      |      |                       |             |              |              |             | X           | Cbl proto-oncogene, E3 ubiquitin protein ligase B                                                     |                  |
| 1012   | CDH13         | DOWN      |      |                       | X           |              |              |             |             | cadherin 13, H-cadherin (heart)                                                                       |                  |
| 1056   | CEL           | DOWN      |      |                       |             |              |              | X           |             | carboxyl ester lipase (bile salt-stimulated lipase)                                                   |                  |
| 1063   | CENPF         | DOWN      |      |                       |             |              |              | X           | X           | centromere protein F, 350/400kDa                                                                      |                  |
| 3075   | CFH           | DOWN      |      |                       | X           |              |              |             |             | complement factor H                                                                                   |                  |
| 1653   | DDX1          | DOWN      |      |                       |             | X            |              |             |             | DEAD (Asp-Glu-Ala-Asp) box helicase 1                                                                 |                  |
| 2202   | EFEMP1        | UP        |      |                       | X           |              |              |             |             | EGF containing fibulin-like extracellular matrix protein 1                                            |                  |
| 2191   | FAP           | DOWN      |      |                       |             |              |              | X           |             | fibroblast activation protein, alpha                                                                  |                  |
| 2271   | FH            | DOWN      | X    |                       |             |              |              |             | X           | fumarate hydratase                                                                                    |                  |
| 10468  | FST           | DOWN      |      |                       |             | X            |              |             |             | follicstatin                                                                                          |                  |
| 2521   | FUS           | DOWN      | X    |                       |             |              |              |             | X           | fused in sarcoma                                                                                      |                  |
| 2535   | FZD2          | DOWN      |      |                       |             | X            |              |             |             | frizzled family receptor 2                                                                            |                  |
| 11146  | GLMN          | DOWN      |      |                       |             |              |              | X           | X           | glomulin, FKBP associated protein                                                                     |                  |
| 29889  | GNL2          | DOWN      | X    |                       |             | X            |              |             |             | guanine nucleotide binding protein-like 2 (nucleolar)                                                 |                  |
| 3065   | HDAC1         | DOWN      |      |                       |             |              |              | X           |             | histone deacetylase 1                                                                                 |                  |
| 3066   | HDAC2         | DOWN      |      |                       |             | X            |              |             |             | histone deacetylase 2                                                                                 |                  |
| 3092   | HIP1          | DOWN      |      |                       |             |              |              |             | X           | huntingtin interacting protein 1                                                                      |                  |
| 8364   | HIST1H4C      | DOWN      |      |                       |             | X            |              |             |             | histone cluster 1, H4c                                                                                |                  |
| 3181   | HNRNPA2B1     | DOWN      |      |                       |             |              |              | X           |             | heterogeneous nuclear ribonucleoprotein A2/B1                                                         |                  |
| 3329   | HSPD1         | DOWN      |      |                       |             |              |              | X           | X           | heat shock 60kDa protein 1 (chaperonin)                                                               |                  |
| 3609   | ILF3          | DOWN      | X    |                       |             |              |              |             |             | interleukin enhancer binding factor 3, 90kDa                                                          |                  |
| 3667   | IRS1          | DOWN      |      |                       | X           |              |              |             |             | insulin receptor substrate 1                                                                          |                  |
| 5927   | KDM5A         | DOWN      |      |                       |             |              |              |             | X           | lysine (K)-specific demethylase 5A                                                                    |                  |
| 9933   | KIAA0020      | DOWN      |      |                       |             | X            |              |             |             | KIAA0020                                                                                              |                  |
| 4437   | MSH3          | DOWN      |      |                       |             |              |              |             | X           | mutS homolog 3 (E. coli)                                                                              |                  |
| 2956   | MSH6          | DOWN      |      |                       | X           | X            |              |             | X           | mutS homolog 6 (E. coli)                                                                              |                  |
| 10797  | MTHFD2        | DOWN      |      |                       |             | X            |              | X           |             | methylenetetrahydrofolate dehydrogenase (NADP+ dependent) 2, methylenetetrahydrofolate cyclohydrolase |                  |
| 4610   | MYCL1         | DOWN      |      |                       | X           |              |              |             |             | v-myc myelocytomatosis viral oncogene homolog 1, lung carcinoma derived (avian)                       |                  |
| 9315   | NREP          | DOWN      |      |                       |             | X            |              |             |             | neuronal regeneration related protein                                                                 |                  |
| 142    | PARP1         | DOWN      | X    |                       |             |              |              |             |             | poly (ADP-ribose) polymerase 1                                                                        |                  |
| 27250  | PDCD4         | DOWN      |      |                       |             |              |              |             | X           | programmed cell death 4 (neoplastic transformation inhibitor)                                         |                  |
| 56937  | PMEPA1        | DOWN      | X    |                       |             |              |              |             |             | prostate transmembrane protein, androgen induced 1                                                    |                  |
| 5587   | PRKD1         | DOWN      |      |                       | X           |              |              |             |             | protein kinase D1                                                                                     |                  |
| 5696   | PSMB8         | DOWN      | X    |                       |             |              |              |             |             | proteasome (prosome, macropain) subunit, beta type, 8 (large multifunctional peptidase 7)             |                  |
| 861    | RUNX1         | DOWN      | X    |                       |             |              |              |             | X           | runt-related transcription factor 1                                                                   |                  |
| 6275   | S100A4        | DOWN      |      |                       |             |              |              | X           |             | S100 calcium binding protein A4                                                                       |                  |
| 6597   | SMARCA4       | DOWN      |      |                       |             |              |              | X           |             | SWI/SNF related, matrix associated, actin dependent regulator of chromatin, subfamily a, member 4     |                  |
| 6427   | SRSF2         | DOWN      |      |                       |             |              |              | X           |             | serine/arginine-rich splicing factor 2                                                                |                  |
| 6745   | SSR1          | DOWN      |      |                       |             |              |              |             | X           | signal sequence receptor, alpha                                                                       |                  |
| 6890   | TAP1          | DOWN      | X    |                       |             |              |              |             |             | transporter 1, ATP-binding cassette, sub-family B (MDR/TAP)                                           |                  |
| 6925   | TCF4          | DOWN      |      |                       |             |              |              | X           |             | transcription factor 4                                                                                |                  |
| 7078   | TIMP3         | DOWN      |      |                       | X           |              |              |             |             | TIMP metalloproteinase inhibitor 3                                                                    |                  |
| 7175   | TPR           | DOWN      |      |                       |             |              |              |             | X           | translocated promoter region, nuclear basket protein                                                  |                  |
| 7412   | VCAM1         | DOWN      |      |                       | X           |              |              |             |             | vascular cell adhesion molecule 1                                                                     |                  |
|        | Total genes:  | 51        |      |                       |             |              |              |             |             |                                                                                                       |                  |
|        | List B total: | 296       |      |                       |             |              |              |             |             |                                                                                                       |                  |

| List Ca | GeneID         | Gene name | FSHD | Cancer-related genes: |        |        |        |        |        |        | Gene description                                                                      |
|---------|----------------|-----------|------|-----------------------|--------|--------|--------|--------|--------|--------|---------------------------------------------------------------------------------------|
|         |                |           |      | List 1                | List 2 | List 3 | List 4 | List 5 | List 6 | List 7 |                                                                                       |
|         |                |           |      | 1                     | 0      | 14     | 0      | 1      | 0      | 10     |                                                                                       |
|         | 58             | ACTA1     | UP   |                       |        | X      |        |        |        |        | actin, alpha 1, skeletal muscle                                                       |
|         | 100            | ADA       | DOWN |                       |        | X      |        |        |        |        | adenosine deaminase                                                                   |
|         | 217            | ALDH2     | UP   |                       |        |        |        |        |        | X      | aldehyde dehydrogenase 2 family (mitochondrial)                                       |
|         | 241            | ALOX5AP   | DOWN |                       |        |        |        |        |        | X      | arachidonate 5-lipoxygenase-activating protein                                        |
|         | 637            | BID       | DOWN | X                     |        |        |        |        |        |        | BH3 interacting domain death agonist                                                  |
|         | 805            | CALM2     | UP   |                       |        | X      |        |        |        |        | calmodulin 2 (phosphorylase kinase, delta)                                            |
|         | 10983          | CCNI      | DOWN |                       |        | X      |        |        |        |        | cyclin I                                                                              |
|         | 3075           | CFH       | DOWN |                       |        | X      |        |        |        |        | complement factor H                                                                   |
|         | 1345           | COX6C     | DOWN |                       |        |        |        |        |        | X      | cytochrome c oxidase subunit VIc                                                      |
|         | 1508           | CTSB      | UP   |                       |        |        |        |        |        | X      | cathepsin B                                                                           |
|         | 7913           | DEK       | UP   |                       |        |        |        |        |        | X      | DEK oncogene                                                                          |
|         | 1674           | DES       | UP   |                       |        | X      |        |        |        |        | desmin                                                                                |
|         | 2273           | FHL1      | DOWN |                       |        | X      |        |        |        |        | four and a half LIM domains 1                                                         |
|         | 2597           | GAPDH     | UP   |                       |        | X      |        |        |        |        | glyceraldehyde-3-phosphate dehydrogenase                                              |
|         | 27259          | HPLH1     | DOWN |                       |        | X      |        |        |        |        | hemophagocytic lymphohistiocytosis 1                                                  |
|         | 11343          | MGLL      | DOWN |                       |        | X      |        |        |        |        | monoglyceride lipase                                                                  |
|         | 4946           | OAZ1      | UP   |                       |        | X      |        |        |        |        | ornithine decarboxylase antizyme 1                                                    |
|         | 5052           | PRDX1     | DOWN |                       |        |        |        |        |        | X      | peroxiredoxin 1                                                                       |
|         | 5684           | PSMA3     | UP   |                       |        | X      |        |        |        |        | proteasome (prosome, macropain) subunit, alpha type, 3                                |
|         | 5743           | PTGS2     | UP   |                       |        |        |        |        |        | X      | prostaglandin-endoperoxide synthase 2 (prostaglandin G/H synthase and cyclooxygenase) |
|         | 389            | RHOC      | UP   |                       |        |        |        |        |        | X      | ras homolog family member C                                                           |
|         | 11236          | RNF139    | UP   |                       |        |        |        |        |        | X      | ring finger protein 139                                                               |
|         | 57142          | RTN4      | DOWN |                       |        |        |        |        |        | X      | reticulon 4                                                                           |
|         | 7135           | TNNI1     | UP   |                       |        | X      |        |        |        |        | troponin I type 1 (skeletal, slow)                                                    |
|         | 7136           | TNNI2     | UP   |                       |        | X      |        |        |        |        | troponin I type 2 (skeletal, fast)                                                    |
|         | 7140           | TNNT3     | UP   |                       |        | X      |        |        |        |        | troponin T type 3 (skeletal, fast)                                                    |
|         | 7169           | TPM2      | UP   |                       |        |        |        |        | X      |        | tropomyosin 2 (beta)                                                                  |
|         | Total genes:   |           | 27   |                       |        |        |        |        |        |        |                                                                                       |
|         | List Ca total: |           | 207  |                       |        |        |        |        |        |        |                                                                                       |

| List Cb | GeneID | Gene name      | FSHD | Cancer-related genes: |        |        |        |        |        |        | Gene description                                                                      |
|---------|--------|----------------|------|-----------------------|--------|--------|--------|--------|--------|--------|---------------------------------------------------------------------------------------|
|         |        |                |      | List 1                | List 2 | List 3 | List 4 | List 5 | List 6 | List 7 |                                                                                       |
|         | 58     | ACTA1          | UP   |                       |        | X      |        |        |        |        | actin, alpha 1, skeletal muscle                                                       |
|         | 100    | ADA            | UP   |                       |        | X      |        |        |        |        | adenosine deaminase                                                                   |
|         | 217    | ALDH2          | DOWN |                       |        |        |        |        |        | X      | aldehyde dehydrogenase 2 family (mitochondrial)                                       |
|         | 573    | BAG1           | UP   |                       |        |        |        | X      |        |        | BCL2-associated athanogene                                                            |
|         | 805    | CALM2          | UP   |                       |        | X      |        |        |        |        | calmodulin 2 (phosphorylase kinase, delta)                                            |
|         | 10983  | CCNI           | DOWN |                       |        | X      |        |        |        |        | cyclin I                                                                              |
|         | 3075   | CFH            | UP   |                       |        | X      |        |        |        |        | complement factor H                                                                   |
|         | 1345   | COX6C          | UP   |                       |        |        |        |        |        | X      | cytochrome c oxidase subunit VIc                                                      |
|         | 1508   | CTSB           | UP   |                       |        |        |        |        |        | X      | cathepsin B                                                                           |
|         | 7913   | DEK            | UP   |                       |        |        |        |        |        | X      | DEK oncogene                                                                          |
|         | 1674   | DES            | DOWN |                       |        | X      |        |        |        |        | desmin                                                                                |
|         | 2273   | FHL1           | UP   |                       |        | X      |        |        |        |        | four and a half LIM domains 1                                                         |
|         | 2597   | GAPDH          | UP   |                       |        | X      |        |        |        |        | glyceraldehyde-3-phosphate dehydrogenase                                              |
|         | 27259  | HPLH1          | UP   |                       |        | X      |        |        |        |        | hemophagocytic lymphohistiocytosis 1                                                  |
|         | 4946   | OAZ1           | UP   |                       |        | X      |        |        |        |        | ornithine decarboxylase antizyme 1                                                    |
|         | 5052   | PRDX1          | UP   |                       |        |        |        |        |        | X      | peroxiredoxin 1                                                                       |
|         | 5684   | PSMA3          | UP   |                       |        | X      |        |        |        |        | proteasome (prosome, macropain) subunit, alpha type, 3                                |
|         | 5743   | PTGS2          | UP   |                       |        |        |        |        |        | X      | prostaglandin-endoperoxide synthase 2 (prostaglandin G/H synthase and cyclooxygenase) |
|         | 389    | RHOC           | DOWN |                       |        |        |        |        |        | X      | ras homolog family member C                                                           |
|         | 11236  | RNF139         | UP   |                       |        |        |        |        |        | X      | ring finger protein 139                                                               |
|         | 57142  | RTN4           | UP   |                       |        |        |        |        |        | X      | reticulon 4                                                                           |
|         | 7135   | TNNI1          | DOWN |                       |        | X      |        |        |        |        | troponin I type 1 (skeletal, slow)                                                    |
|         | 7136   | TNNI2          | UP   |                       |        | X      |        |        |        |        | troponin I type 2 (skeletal, fast)                                                    |
|         | 7140   | TNNT3          | DOWN |                       |        | X      |        |        |        |        | troponin T type 3 (skeletal, fast)                                                    |
|         | 7169   | TPM2           | DOWN |                       |        |        |        | X      |        |        | tropomyosin 2 (beta)                                                                  |
|         |        | Total genes:   | 25   |                       |        |        |        |        |        |        |                                                                                       |
|         |        | List Cb total: | 177  |                       |        |        |        |        |        |        |                                                                                       |

| List Cc | GeneID         | Gene name | FSHD | Cancer-related genes: |        |        |        |        |        |        | Gene description                                                                      |
|---------|----------------|-----------|------|-----------------------|--------|--------|--------|--------|--------|--------|---------------------------------------------------------------------------------------|
|         |                |           |      | List 1                | List 2 | List 3 | List 4 | List 5 | List 6 | List 7 |                                                                                       |
|         |                |           |      | 0                     | 0      | 13     | 0      | 2      | 0      | 9      |                                                                                       |
|         | 58             | ACTA1     | UP   |                       |        | X      |        |        |        |        | actin, alpha 1, skeletal muscle                                                       |
|         | 100            | ADA       | UP   |                       |        | X      |        |        |        |        | adenosine deaminase                                                                   |
|         | 217            | ALDH2     | DOWN |                       |        |        |        |        | X      |        | aldehyde dehydrogenase 2 family (mitochondrial)                                       |
|         | 573            | BAG1      | UP   |                       |        |        |        | X      |        |        | BCL2-associated athanogene                                                            |
|         | 805            | CALM2     | UP   |                       |        | X      |        |        |        |        | calmodulin 2 (phosphorylase kinase, delta)                                            |
|         | 10983          | CCN1      | DOWN |                       |        | X      |        |        |        |        | cyclin I                                                                              |
|         | 3075           | CFH       | DOWN |                       |        | X      |        |        |        |        | complement factor H                                                                   |
|         | 1345           | COX6C     | DOWN |                       |        |        |        |        | X      |        | cytochrome c oxidase subunit VIc                                                      |
|         | 1508           | CTSB      | UP   |                       |        |        |        |        | X      |        | cathepsin B                                                                           |
|         | 7913           | DEK       | DOWN |                       |        |        |        |        | X      |        | DEK oncogene                                                                          |
|         | 1674           | DES       | UP   |                       |        | X      |        |        |        |        | desmin                                                                                |
|         | 2273           | FHL1      | DOWN |                       |        | X      |        |        |        |        | four and a half LIM domains 1                                                         |
|         | 2597           | GAPDH     | UP   |                       |        | X      |        |        |        |        | glyceraldehyde-3-phosphate dehydrogenase                                              |
|         | 27259          | HPLH1     | DOWN |                       |        | X      |        |        |        |        | hemophagocytic lymphohistiocytosis 1                                                  |
|         | 4946           | OAZ1      | UP   |                       |        | X      |        |        |        |        | ornithine decarboxylase antizyme 1                                                    |
|         | 5052           | PRDX1     | UP   |                       |        |        |        |        | X      |        | peroxiredoxin 1                                                                       |
|         | 5684           | PSMA3     | DOWN |                       |        | X      |        |        |        |        | proteasome (prosome, macropain) subunit, alpha type, 3                                |
|         | 5743           | PTGS2     | UP   |                       |        |        |        |        | X      |        | prostaglandin-endoperoxide synthase 2 (prostaglandin G/H synthase and cyclooxygenase) |
|         | 389            | RHOC      | UP   |                       |        |        |        |        | X      |        | ras homolog family member C                                                           |
|         | 11236          | RNF139    | UP   |                       |        |        |        |        | X      |        | ring finger protein 139                                                               |
|         | 57142          | RTN4      | DOWN |                       |        |        |        |        | X      |        | reticulon 4                                                                           |
|         | 7135           | TNNI1     | UP   |                       |        | X      |        |        |        |        | troponin I type 1 (skeletal, slow)                                                    |
|         | 7136           | TNNI2     | DOWN |                       |        | X      |        |        |        |        | troponin I type 2 (skeletal, fast)                                                    |
|         | 7140           | TNNT3     | DOWN |                       |        | X      |        |        |        |        | troponin T type 3 (skeletal, fast)                                                    |
|         | 7169           | TPM2      | UP   |                       |        |        |        | X      |        |        | tropomyosin 2 (beta)                                                                  |
|         | Total genes:   | 25        |      |                       |        |        |        |        |        |        |                                                                                       |
|         | List Cc total: | 177       |      |                       |        |        |        |        |        |        |                                                                                       |

| List D | GeneID        | Gene name | FSHD | Cancer-related genes: |        |        |        |        |        |        | Gene description |                                                         |
|--------|---------------|-----------|------|-----------------------|--------|--------|--------|--------|--------|--------|------------------|---------------------------------------------------------|
|        |               |           |      | List 1                | List 2 | List 3 | List 4 | List 5 | List 6 | List 7 |                  |                                                         |
|        |               |           |      | 1                     | 0      | 0      | 0      | 0      | 0      | 0      | 3                |                                                         |
|        | 1620          | DBC1      | UP   |                       |        |        | X      |        |        |        |                  | deleted in bladder cancer 1                             |
|        | 23266         | LPHN2     | UP   |                       |        |        |        |        |        |        | X                | latrophilin 2                                           |
|        | 5918          | RARRES1   | UP   |                       |        |        |        |        |        |        | X                | retinoic acid receptor responder (tazarotene induced) 1 |
|        | 7058          | THBS2     | UP   |                       |        |        |        |        |        |        | X                | thrombospondin 2                                        |
|        | 8840          | WISP1     | UP   | X                     |        |        |        |        |        |        |                  | WNT1 inducible signaling pathway protein 1              |
|        | Total genes:  |           | 5    |                       |        |        |        |        |        |        |                  |                                                         |
|        | List D total: |           | 32   |                       |        |        |        |        |        |        |                  |                                                         |

| List Ea | GeneID | Gene name      | FSHD | Cancer-related genes: |        |        |        |        |        |        | Gene description                                                                                |
|---------|--------|----------------|------|-----------------------|--------|--------|--------|--------|--------|--------|-------------------------------------------------------------------------------------------------|
|         |        |                |      | List 1                | List 2 | List 3 | List 4 | List 5 | List 6 | List 7 |                                                                                                 |
|         | 59     | ACTA2          | UP   |                       |        | X      |        |        |        |        | actin, alpha 2, smooth muscle, aorta                                                            |
|         | 70     | ACTC1          | UP   |                       |        | X      |        |        |        |        | actin, alpha, cardiac muscle 1                                                                  |
|         | 301    | ANXA1          | UP   |                       |        | X      |        |        |        |        | annexin A1                                                                                      |
|         | 8853   | ASAP2          | UP   |                       |        | X      |        |        |        |        | ArfGAP with SH3 domain, ankyrin repeat and PH domain 2                                          |
|         | 580    | BARD1          | DOWN |                       |        |        |        |        | X      |        | BRCA1 associated RING domain 1                                                                  |
|         | 800    | CALD1          | UP   |                       |        |        |        | X      |        |        | caldesmon 1                                                                                     |
|         | 960    | CD44           | UP   |                       |        | X      |        |        |        |        | CD44 molecule (Indian blood group)                                                              |
|         | 3075   | CFH            | UP   |                       |        | X      |        |        |        |        | complement factor H                                                                             |
|         | 1191   | CLU            | UP   | X                     |        |        |        |        |        |        | clusterin                                                                                       |
|         | 23406  | COTL1          | UP   |                       |        |        |        | X      |        |        | coactosin-like 1 (Dictyostelium)                                                                |
|         | 1490   | CTGF           | UP   |                       |        |        |        |        | X      |        | connective tissue growth factor                                                                 |
|         | 11034  | DSTN           | UP   |                       |        |        |        | X      |        |        | destrin (actin depolymerizing factor)                                                           |
|         | 1871   | E2F3           | UP   | X                     |        |        |        |        | X      |        | E2F transcription factor 3                                                                      |
|         | 2192   | FBLN1          | UP   |                       |        |        |        | X      |        |        | fibulin 1                                                                                       |
|         | 2329   | FMO2           | DOWN | X                     |        |        |        |        |        |        | flavin containing monooxygenase 2 (non-functional)                                              |
|         | 84624  | FNDC1          | UP   |                       |        | X      |        |        |        |        | fibronectin type III domain containing 1                                                        |
|         | 3090   | HIC1           | UP   |                       |        |        |        |        | X      |        | hypermethylated in cancer 1                                                                     |
|         | 3383   | ICAM1          | UP   |                       |        | X      |        |        |        |        | intercellular adhesion molecule 1                                                               |
|         | 23463  | ICMT           | UP   |                       |        |        | X      |        |        |        | isoprenylcysteine carboxyl methyltransferase                                                    |
|         | 3643   | INSR           | DOWN |                       |        | X      |        |        |        |        | insulin receptor                                                                                |
|         | 3667   | IRS1           | DOWN |                       |        | X      |        |        |        |        | insulin receptor substrate 1                                                                    |
|         | 3727   | JUND           | UP   |                       |        |        |        |        | X      |        | jun D proto-oncogene                                                                            |
|         | 23313  | KIAA0930       | UP   |                       |        |        |        | X      |        |        | KIAA0930                                                                                        |
|         | 378938 | MALAT1         | DOWN |                       |        |        | X      |        |        |        | metastasis associated lung adenocarcinoma transcript 1 (non-protein coding)                     |
|         | 4233   | MET            | DOWN | X                     | X      |        |        |        | X      |        | met proto-oncogene (hepatocyte growth factor receptor)                                          |
|         | 8731   | MET            | DOWN |                       |        | X      |        |        |        |        | met proto-oncogene (hepatocyte growth factor receptor)                                          |
|         | 10962  | MLLT11         | UP   |                       |        |        |        | X      | X      |        | myeloid/lymphoid or mixed-lineage leukemia (trithorax homolog, Drosophila); translocated to, 11 |
|         | 4478   | MSN            | UP   |                       |        |        |        |        | X      |        | moesin                                                                                          |
|         | 9961   | MVP            | UP   |                       |        |        |        |        | X      |        | major vault protein                                                                             |
|         | 3164   | NR4A1          | UP   |                       |        | X      |        |        |        |        | nuclear receptor subfamily 4, group A, member 1                                                 |
|         | 9315   | NREP           | DOWN |                       |        |        | X      |        |        |        | neuronal regeneration related protein                                                           |
|         | 4915   | NTRK2          | UP   |                       |        |        |        |        | X      |        | neurotrophic tyrosine kinase, receptor, type 2                                                  |
|         | 8572   | PDLIM4         | UP   |                       |        |        |        | X      |        |        | PDZ and LIM domain 4                                                                            |
|         | 5788   | PTPRC          | UP   |                       |        |        | X      |        |        |        | protein tyrosine phosphatase, receptor type, C                                                  |
|         | 80031  | SEMA6D         | DOWN | X                     |        |        |        |        |        |        | sema domain, transmembrane domain (TM), and cytoplasmic domain, (semaphorin) 6D                 |
|         | 6418   | SET            | DOWN |                       |        |        |        |        | X      |        | SET nuclear oncogene                                                                            |
|         | 23235  | SIK2           | UP   | X                     |        |        |        |        |        |        | salt-inducible kinase 2                                                                         |
|         | 8148   | TAF15          | DOWN |                       |        |        |        |        | X      |        | TAF15 RNA polymerase II, TATA box binding protein (TBP)-associated factor, 68kDa                |
|         | 7057   | THBS1          | UP   |                       |        |        |        | X      |        |        | thrombospondin 1                                                                                |
|         | 7058   | THBS2          | UP   |                       |        |        |        |        | X      |        | thrombospondin 2                                                                                |
|         | 10376  | TUBA1B         | UP   | X                     |        |        |        |        |        |        | tubulin, alpha 1b                                                                               |
|         | 7431   | VIM            | UP   |                       |        | X      |        |        |        |        | vimentin                                                                                        |
|         | 26137  | ZBTB20         | DOWN |                       |        |        | X      |        |        |        | zinc finger and BTB domain containing 20                                                        |
|         | 677    | ZFP36L1        | UP   |                       |        |        |        |        | X      |        | ZFP36 ring finger protein-like 1                                                                |
|         |        | Total genes:   | 44   |                       |        |        |        |        |        |        |                                                                                                 |
|         |        | List Ea total: | 326  |                       |        |        |        |        |        |        |                                                                                                 |

| List Eb | GeneID | Gene name      | FSHD | Cancer-related genes: |             |             |             |             |             |             | Gene description                                                                |
|---------|--------|----------------|------|-----------------------|-------------|-------------|-------------|-------------|-------------|-------------|---------------------------------------------------------------------------------|
|         |        |                |      | List 1<br>1           | List 2<br>1 | List 3<br>5 | List 4<br>3 | List 5<br>3 | List 6<br>0 | List 7<br>7 |                                                                                 |
|         | 580    | BARD1          | DOWN |                       |             |             |             |             |             | X           | BRCA1 associated RING domain 1                                                  |
|         | 960    | CD44           | UP   |                       |             | X           |             |             |             |             | CD44 molecule (Indian blood group)                                              |
|         | 23406  | COTL1          | UP   |                       |             |             |             |             | X           |             | coactosin-like 1 (Dictyostelium)                                                |
|         | 1490   | CTGF           | UP   |                       |             |             |             |             |             | X           | connective tissue growth factor                                                 |
|         | 3090   | HIC1           | UP   |                       |             |             |             |             |             | X           | hypermethylated in cancer 1                                                     |
|         | 3383   | ICAM1          | UP   |                       |             | X           |             |             |             |             | intercellular adhesion molecule 1                                               |
|         | 23463  | ICMT           | UP   |                       |             |             | X           |             |             |             | isoprenylcysteine carboxyl methyltransferase                                    |
|         | 3643   | INSR           | DOWN |                       |             | X           |             |             |             |             | insulin receptor                                                                |
|         | 3727   | JUND           | UP   |                       |             |             |             |             |             | X           | jun D proto-oncogene                                                            |
|         | 23313  | KIAA0930       | UP   |                       |             |             |             | X           |             |             | KIAA0930                                                                        |
|         | 4233   | MET            | DOWN | X                     | X           |             |             |             |             | X           | met proto-oncogene (hepatocyte growth factor receptor)                          |
|         | 8731   | MET            | DOWN |                       |             | X           |             |             |             |             | met proto-oncogene (hepatocyte growth factor receptor)                          |
|         | 9315   | NREP           | DOWN |                       |             |             | X           |             |             |             | neuronal regeneration related protein                                           |
|         | 80031  | SEMA6D         | DOWN | X                     |             |             |             |             |             |             | sema domain, transmembrane domain (TM), and cytoplasmic domain, (semaphorin) 6D |
|         | 6418   | SET            | DOWN |                       |             |             |             |             |             | X           | SET nuclear oncogene                                                            |
|         | 7057   | THBS1          | UP   |                       |             |             |             | X           |             | X           | thrombospondin 1                                                                |
|         | 26137  | ZBTB20         | DOWN |                       |             |             | X           |             |             |             | zinc finger and BTB domain containing 20                                        |
|         | 677    | ZFP36L1        | UP   |                       |             |             |             |             |             | X           | ZFP36 ring finger protein-like 1                                                |
|         |        | Total genes:   | 18   |                       |             |             |             |             |             |             |                                                                                 |
|         |        | List Eb total: | 156  |                       |             |             |             |             |             |             |                                                                                 |

| List Fa | Gene name | FSHD | Cancer-related genes: |        |        |        |        |        |        | Gene description                                                                                      |
|---------|-----------|------|-----------------------|--------|--------|--------|--------|--------|--------|-------------------------------------------------------------------------------------------------------|
|         |           |      | List 1                | List 2 | List 3 | List 4 | List 5 | List 6 | List 7 |                                                                                                       |
| GeneID  |           |      | 14                    | 3      | 11     | 24     | 5      | 9      | 23     |                                                                                                       |
| 231     | AKR1B1    | UP   |                       |        | X      |        |        |        |        | aldo-keto reductase family 1, member B1 (aldose reductase)                                            |
| 80210   | ARMC9     | UP   |                       |        |        | X      |        |        |        | armadillo repeat containing 9                                                                         |
| 6790    | AURKA     | DOWN | X                     |        |        |        |        |        |        | aurora kinase A                                                                                       |
| 79870   | BAALC     | UP   |                       |        |        |        |        |        | X      | brain and acute leukemia, cytoplasmic                                                                 |
| 641     | BLM       | DOWN |                       |        |        |        |        |        | X      | Bloom syndrome, RecQ helicase-like                                                                    |
| 672     | BRCA1     | DOWN |                       | X      | X      |        |        |        | X      | breast cancer 1, early onset                                                                          |
| 675     | BRCA2     | DOWN |                       |        | X      |        |        |        |        | breast cancer 2, early onset                                                                          |
| 2187    | BRCA2     | DOWN |                       |        |        | X      |        |        |        | breast cancer 2, early onset                                                                          |
| 701     | BUB1B     | DOWN |                       |        |        | X      |        |        | X      | BUB1 mitotic checkpoint serine/threonine kinase B                                                     |
| 10826   | C5orf4    | UP   | X                     |        |        |        |        |        |        | chromosome 5 open reading frame 4                                                                     |
| 57082   | CASC5     | DOWN | X                     |        |        |        |        |        | X      | cancer susceptibility candidate 5                                                                     |
| 890     | CCNA2     | DOWN |                       |        |        | X      |        |        |        | cyclin A2                                                                                             |
| 993     | CDC25A    | DOWN |                       |        |        | X      |        |        | X      | cell division cycle 25A                                                                               |
| 990     | CDC6      | DOWN |                       |        |        |        |        |        | X      | cell division cycle 6                                                                                 |
| 983     | CDK1      | DOWN |                       |        |        |        |        |        | X      | cyclin-dependent kinase 1                                                                             |
| 1017    | CDK2      | DOWN |                       |        | X      |        |        |        |        | cyclin-dependent kinase 2                                                                             |
| 1062    | CENPE     | DOWN |                       |        |        | X      |        |        |        | centromere protein E, 312kDa                                                                          |
| 1063    | CENPF     | DOWN |                       |        |        |        | X      |        | X      | centromere protein F, 350/400kDa                                                                      |
| 2491    | CENPI     | DOWN |                       |        |        |        | X      |        |        | centromere protein I                                                                                  |
| 55165   | CEP55     | DOWN | X                     |        |        |        |        |        |        | centrosomal protein 55kDa                                                                             |
| 79077   | DCTPP1    | DOWN | X                     |        |        |        |        |        |        | dCTP pyrophosphatase 1                                                                                |
| 81624   | DIAPH3    | DOWN |                       |        |        | X      |        |        |        | diaphanous homolog 3 (Drosophila)                                                                     |
| 9787    | DLGAP5    | DOWN |                       |        |        | X      |        |        |        | discs, large (Drosophila) homolog-associated protein 5                                                |
| 1786    | DNMT1     | DOWN | X                     |        |        |        |        |        | X      | DNA (cytosine-5-)-methyltransferase 1                                                                 |
| 2202    | EFEMP1    | DOWN |                       |        | X      |        |        |        |        | EGF containing fibulin-like extracellular matrix protein 1                                            |
| 2175    | FANCA     | DOWN |                       |        |        |        |        |        | X      | Fanconi anemia, complementation group A                                                               |
| 2187    | FANCB     | DOWN |                       |        |        | X      |        |        |        | Fanconi anemia, complementation group B                                                               |
| 2176    | FANCC     | DOWN |                       |        |        |        |        |        | X      | Fanconi anemia, complementation group C                                                               |
| 2192    | FBLN1     | UP   |                       |        |        |        |        | X      |        | fibulin 1                                                                                             |
| 2237    | FEN1      | DOWN | X                     |        |        |        |        |        |        | flap structure-specific endonuclease 1                                                                |
| 2272    | FHIT      | UP   |                       |        |        |        |        |        | X      | fragile histidine triad                                                                               |
| 23767   | FLRT3     | UP   |                       |        | X      |        |        |        |        | fibronectin leucine rich transmembrane protein 3                                                      |
| 2305    | FOXM1     | DOWN |                       |        |        |        |        |        | X      | forkhead box M1                                                                                       |
| 10468   | FST       | DOWN |                       |        |        |        | X      |        |        | follicle-stimulating hormone receptor 1                                                               |
| 2495    | FTH1      | UP   |                       |        | X      |        |        |        |        | ferritin, heavy polypeptide 1                                                                         |
| 8364    | HIST1H4C  | DOWN |                       |        |        | X      |        |        |        | histone cluster 1, H4c                                                                                |
| 55355   | HJURP     | DOWN | X                     |        |        |        |        |        |        | Holliday junction recognition protein                                                                 |
| 3207    | HOXA11    | UP   |                       | X      |        |        |        |        | X      | homeobox A11                                                                                          |
| 3229    | HOXC13    | UP   |                       | X      |        |        |        |        |        | homeobox C13                                                                                          |
| 128239  | IQGAP3    | DOWN | X                     |        |        |        |        |        |        | IQ motif containing GTPase activating protein 3                                                       |
| 3832    | KIF11     | DOWN |                       |        |        | X      |        |        |        | kinesin family member 11                                                                              |
| 9928    | KIF14     | DOWN |                       |        |        |        |        |        | X      | kinesin family member 14                                                                              |
| 9493    | KIF23     | DOWN |                       |        |        | X      |        |        |        | kinesin family member 23                                                                              |
| 24137   | KIF4A     | DOWN |                       |        |        |        |        | X      |        | kinesin family member 4A                                                                              |
| 55388   | MCM10     | DOWN |                       |        |        | X      |        |        |        | minichromosome maintenance complex component 10                                                       |
| 4172    | MCM3      | DOWN |                       |        |        |        |        | X      |        | minichromosome maintenance complex component 3                                                        |
| 4173    | MCM4      | DOWN |                       |        |        | X      |        |        |        | minichromosome maintenance complex component 4                                                        |
| 4175    | MCM6      | DOWN |                       |        |        |        | X      |        |        | minichromosome maintenance complex component 6                                                        |
| 4288    | MKI67     | DOWN |                       |        | X      |        |        |        |        | antigen identified by monoclonal antibody Ki-67                                                       |
| 4311    | MME       | UP   |                       |        |        |        |        |        | X      | membrane metallo-endopeptidase                                                                        |
| 4436    | MSH2      | DOWN |                       |        | X      | X      |        |        | X      | mutS homolog 2, colon cancer, nonpolyposis type 1 (E. coli)                                           |
| 10797   | MTHFD2    | DOWN |                       |        |        | X      |        | X      |        | methylene tetrahydrofolate dehydrogenase (NADP+ dependent) 2, methenyltetrahydrofolate cyclohydrolase |
| 4582    | MUC1      | UP   |                       |        | X      |        |        |        |        | mucin 1, cell surface associated                                                                      |
| 64151   | NCAPG     | DOWN |                       |        |        |        |        | X      |        | non-SMC condensin I complex, subunit G                                                                |
| 10403   | NDC80     | DOWN |                       |        |        | X      |        |        |        | NDC80 kinetochore complex component                                                                   |
| 8828    | NRP2      | UP   | X                     |        |        |        |        |        |        | neuropilin 2                                                                                          |
| 23165   | NUP205    | DOWN |                       |        |        |        |        |        | X      | nucleoporin 205kDa                                                                                    |
| 4998    | ORC1      | DOWN |                       |        |        | X      |        |        |        | origin recognition complex, subunit 1                                                                 |
| 5074    | PAWR      | DOWN |                       |        |        |        |        |        | X      | PRKC, apoptosis, WT1, regulator                                                                       |
| 5077    | PAX3      | UP   |                       |        |        |        |        |        | X      | paired box 3                                                                                          |
| 5347    | PLK1      | DOWN |                       |        |        |        |        |        | X X    | polo-like kinase 1                                                                                    |
| 5424    | POLD1     | DOWN |                       |        |        |        |        |        | X      | polymerase (DNA directed), delta 1, catalytic subunit                                                 |
| 5427    | POLE2     | DOWN |                       |        |        | X      |        |        |        | polymerase (DNA directed), epsilon 2, accessory subunit                                               |
| 9055    | PRC1      | DOWN | X                     |        |        |        |        |        |        | protein regulator of cytokinesis 1                                                                    |
| 5557    | PRIM1     | DOWN |                       |        |        | X      |        |        |        | primase, DNA, polypeptide 1 (49kDa)                                                                   |
| 5793    | PTPRG     | UP   |                       |        |        |        |        |        | X      | protein tyrosine phosphatase, receptor type, G                                                        |
| 29127   | RACGAP1   | DOWN |                       |        |        |        |        | X      |        | Rac GTPase activating protein 1                                                                       |
| 10635   | RAD51AP1  | DOWN |                       |        | X      |        |        |        |        | RAD51 associated protein 1                                                                            |
| 5984    | RFC4      | DOWN |                       |        |        |        |        |        | X      | replication factor C (activator 1) 4, 37kDa                                                           |
| 54908   | SPDL1     | DOWN |                       |        |        | X      |        |        |        | spindle apparatus coiled-coil protein 1                                                               |
| 7078    | TIMP3     | DOWN |                       |        | X      |        |        |        |        | TIMP metalloproteinase inhibitor 3                                                                    |
| 10673   | TNFSF13B  | DOWN | X                     |        |        |        |        |        |        | tumor necrosis factor (ligand) superfamily, member 13b                                                |
| 7153    | TOP2A     | DOWN |                       |        |        |        |        |        | X      | topoisomerase (DNA) II alpha 170kDa                                                                   |
| 22974   | TPX2      | DOWN |                       |        |        |        |        |        | X      | TPX2, microtubule-associated, homolog (Xenopus laevis)                                                |
| 7272    | TTK       | DOWN | X                     |        |        |        |        |        |        | TTK protein kinase                                                                                    |

|       |                |      |   |  |  |  |  |  |  |                            |
|-------|----------------|------|---|--|--|--|--|--|--|----------------------------|
| 55055 | ZWILCH         | DOWN | X |  |  |  |  |  |  | zwilch kinetochore protein |
|       | Total genes:   | 78   |   |  |  |  |  |  |  |                            |
|       | List Fa total: | 395  |   |  |  |  |  |  |  |                            |

| List Fb | GeneID         | Gene name | FSHD | Cancer-related genes: |        |        |        |        |        |        | Gene description                                                                                      |
|---------|----------------|-----------|------|-----------------------|--------|--------|--------|--------|--------|--------|-------------------------------------------------------------------------------------------------------|
|         |                |           |      | List 1                | List 2 | List 3 | List 4 | List 5 | List 6 | List 7 |                                                                                                       |
|         | 92             | ACVR2A    | DOWN |                       |        |        |        |        |        | X      | activin A receptor, type IIA                                                                          |
|         | 231            | AKR1B1    | UP   |                       |        | X      |        |        |        |        | aldo-keto reductase family 1, member B1 (aldose reductase)                                            |
|         | 79870          | BAALC     | UP   |                       |        |        |        |        |        | X      | brain and acute leukemia, cytoplasmic                                                                 |
|         | 595            | CCND1     | UP   |                       |        | X      |        |        |        | X      | cyclin D1                                                                                             |
|         | 2202           | EFEMP1    | DOWN |                       |        | X      |        |        |        |        | EGF containing fibulin-like extracellular matrix protein 1                                            |
|         | 23767          | FLRT3     | UP   |                       |        | X      |        |        |        |        | fibronectin leucine rich transmembrane protein 3                                                      |
|         | 3037           | HAS2      | UP   |                       |        |        | X      |        |        |        | hyaluronan synthase 2                                                                                 |
|         | 56243          | KIAA1217  | UP   | X                     |        |        |        |        |        |        | KIAA1217                                                                                              |
|         | 4311           | MME       | UP   |                       |        |        |        |        |        | X      | membrane metallo-endopeptidase                                                                        |
|         | 10797          | MTHFD2    | DOWN |                       |        |        | X      |        | X      |        | methylenetetrahydrofolate dehydrogenase (NADP+ dependent) 2, methylenetetrahydrofolate cyclohydrolase |
|         | 4628           | MYH10     | DOWN |                       |        |        |        |        | X      |        | myosin, heavy chain 10, non-muscle                                                                    |
|         | 8470           | SORBS2    | DOWN | X                     |        |        |        |        |        |        | sorbin and SH3 domain containing 2                                                                    |
|         | Total genes:   |           |      | 12                    |        |        |        |        |        |        |                                                                                                       |
|         | List Fb total: |           |      | 111                   |        |        |        |        |        |        |                                                                                                       |

| List Ga | Gene name      | FSHD | Cancer-related genes: |        |        |        |        |        |        | Gene description                                                                |
|---------|----------------|------|-----------------------|--------|--------|--------|--------|--------|--------|---------------------------------------------------------------------------------|
|         |                |      | List 1                | List 2 | List 3 | List 4 | List 5 | List 6 | List 7 |                                                                                 |
| 59      | ACTA2          | UP   |                       |        | X      |        |        |        |        | actin, alpha 2, smooth muscle, aorta                                            |
| 70      | ACTC1          | UP   |                       |        | X      |        |        |        |        | actin, alpha, cardiac muscle 1                                                  |
| 92      | ACVR2A         | DOWN |                       |        |        |        |        |        | X      | activin A receptor, type IIA                                                    |
| 241     | ALOX5AP        | UP   |                       |        |        |        |        |        | X      | arachidonate 5-lipoxygenase-activating protein                                  |
| 10203   | CALCRL         | UP   |                       |        | X      |        |        |        |        | calcitonin receptor-like                                                        |
| 960     | CD44           | UP   |                       |        | X      |        |        |        |        | CD44 molecule (Indian blood group)                                              |
| 963     | CD53           | UP   |                       |        |        | X      |        |        | X      | CD53 molecule                                                                   |
| 3075    | CFH            | UP   |                       |        | X      |        |        |        |        | complement factor H                                                             |
| 7123    | CLEC3B         | UP   | X                     |        |        |        |        |        |        | C-type lectin domain family 3, member B                                         |
| 1277    | COL1A1         | UP   |                       |        |        |        |        |        | X      | collagen, type I, alpha 1                                                       |
| 2202    | EFEMP1         | UP   |                       |        | X      |        |        |        |        | EGF containing fibulin-like extracellular matrix protein 1                      |
| 2178    | FANCE          | DOWN |                       |        |        |        |        |        | X      | Fanconi anemia, complementation group E                                         |
| 2353    | FOS            | UP   |                       |        | X      |        |        |        |        | FBJ murine osteosarcoma viral oncogene homolog                                  |
| 166647  | GPR125         | DOWN |                       |        |        |        |        | X      |        | G protein-coupled receptor 125                                                  |
| 3479    | IGF1           | UP   |                       |        | X      |        |        |        |        | insulin-like growth factor 1 (somatomedin C)                                    |
| 22807   | IKZF2          | DOWN |                       |        |        |        |        |        | X      | IKAROS family zinc finger 2 (Helios)                                            |
| 3690    | ITGB3          | UP   |                       |        | X      |        |        |        |        | integrin, beta 3 (platelet glycoprotein IIIa, antigen CD61)                     |
| 3702    | ITK            | UP   |                       |        |        |        |        |        | X      | IL2-inducible T-cell kinase                                                     |
| 9211    | LGII           | DOWN |                       |        |        |        |        |        | X      | leucine-rich, glioma inactivated 1                                              |
| 3164    | NR4A1          | UP   |                       |        | X      |        |        |        |        | nuclear receptor subfamily 4, group A, member 1                                 |
| 8643    | PTCH2          | UP   |                       |        |        |        |        |        | X      | patched 2                                                                       |
| 5968    | REG1B          | UP   |                       |        | X      |        |        |        |        | regenerating islet-derived 1 beta                                               |
| 80031   | SEMA6D         | DOWN | X                     |        |        |        |        |        |        | sema domain, transmembrane domain (TM), and cytoplasmic domain, (semaphorin) 6D |
| 5552    | SRGN           | UP   |                       |        | X      |        |        |        |        | serglycin                                                                       |
| 3371    | TNC            | UP   |                       |        |        |        |        |        | X      | tenascin C                                                                      |
| 7139    | TNNT2          | UP   |                       |        | X      |        |        |        |        | troponin T type 2 (cardiac)                                                     |
| 7170    | TPM3           | DOWN |                       |        |        |        |        |        | X      | tropomyosin 3                                                                   |
|         | Total genes:   | 27   |                       |        |        |        |        |        |        |                                                                                 |
|         | List Ga total: | 272  |                       |        |        |        |        |        |        |                                                                                 |

| List Gb | Gene name      | FSHD | Cancer-related genes: |        |        |        |        |        |        | Gene description                                                                |
|---------|----------------|------|-----------------------|--------|--------|--------|--------|--------|--------|---------------------------------------------------------------------------------|
|         |                |      | List 1                | List 2 | List 3 | List 4 | List 5 | List 6 | List 7 |                                                                                 |
| GeneID  |                |      | 2                     | 0      | 7      | 1      | 1      | 0      | 9      |                                                                                 |
| 59      | ACTA2          | UP   |                       |        | X      |        |        |        |        | actin, alpha 2, smooth muscle, aorta                                            |
| 70      | ACTC1          | UP   |                       |        | X      |        |        |        |        | actin, alpha, cardiac muscle 1                                                  |
| 92      | ACVR2A         | DOWN |                       |        |        |        |        |        | X      | activin A receptor, type IIA                                                    |
| 241     | ALOX5AP        | UP   |                       |        |        |        |        |        | X      | arachidonate 5-lipoxygenase-activating protein                                  |
| 963     | CD53           | UP   |                       |        |        | X      |        |        | X      | CD53 molecule                                                                   |
| 7123    | CLEC3B         | UP   | X                     |        |        |        |        |        |        | C-type lectin domain family 3, member B                                         |
| 2202    | EFEMP1         | UP   |                       |        | X      |        |        |        |        | EGF containing fibulin-like extracellular matrix protein 1                      |
| 2353    | FOS            | UP   |                       |        | X      |        |        |        |        | FBJ murine osteosarcoma viral oncogene homolog                                  |
| 166647  | GPR125         | DOWN |                       |        |        |        | X      |        |        | G protein-coupled receptor 125                                                  |
| 22807   | IKZF2          | DOWN |                       |        |        |        |        |        | X      | IKAROS family zinc finger 2 (Helios)                                            |
| 3702    | ITK            | UP   |                       |        |        |        |        |        | X      | IL2-inducible T-cell kinase                                                     |
| 9211    | LGII           | DOWN |                       |        |        |        |        |        | X      | leucine-rich, glioma inactivated 1                                              |
| 3164    | NR4A1          | UP   |                       |        | X      |        |        |        |        | nuclear receptor subfamily 4, group A, member 1                                 |
| 8643    | PTCH2          | UP   |                       |        |        |        |        |        | X      | patched 2                                                                       |
| 5968    | REG1B          | UP   |                       |        | X      |        |        |        |        | regenerating islet-derived 1 beta                                               |
| 80031   | SEMA6D         | DOWN | X                     |        |        |        |        |        |        | sema domain, transmembrane domain (TM), and cytoplasmic domain, (semaphorin) 6D |
| 5552    | SRGN           | UP   |                       |        | X      |        |        |        |        | serglycin                                                                       |
| 3371    | TNC            | UP   |                       |        |        |        |        |        | X      | tenascin C                                                                      |
| 7139    | TNNT2          | UP   |                       |        | X      |        |        |        |        | troponin T type 2 (cardiac)                                                     |
| 7170    | TPM3           | DOWN |                       |        |        |        |        |        | X      | tropomyosin 3                                                                   |
|         | Total genes:   | 20   |                       |        |        |        |        |        |        |                                                                                 |
|         | List Gb total: | 162  |                       |        |        |        |        |        |        |                                                                                 |
